# Supplementary material
Source: publisher site journal article supplement (https://www.spandidos-publications.com/8616/downloadSupplementary)

Figure S1. Molecular weight estimation and sulfated content determination of SG and DSG from *Gracilaria fisheri* by gel permeation chromatography and the barium chloride-gelatin methods. SG, sulfated galactan; DSG, degraded sulfated galactan; Mw, weight-average molecular weight; Mn, number-average molecular weight; Mz, z-average molecular weight.

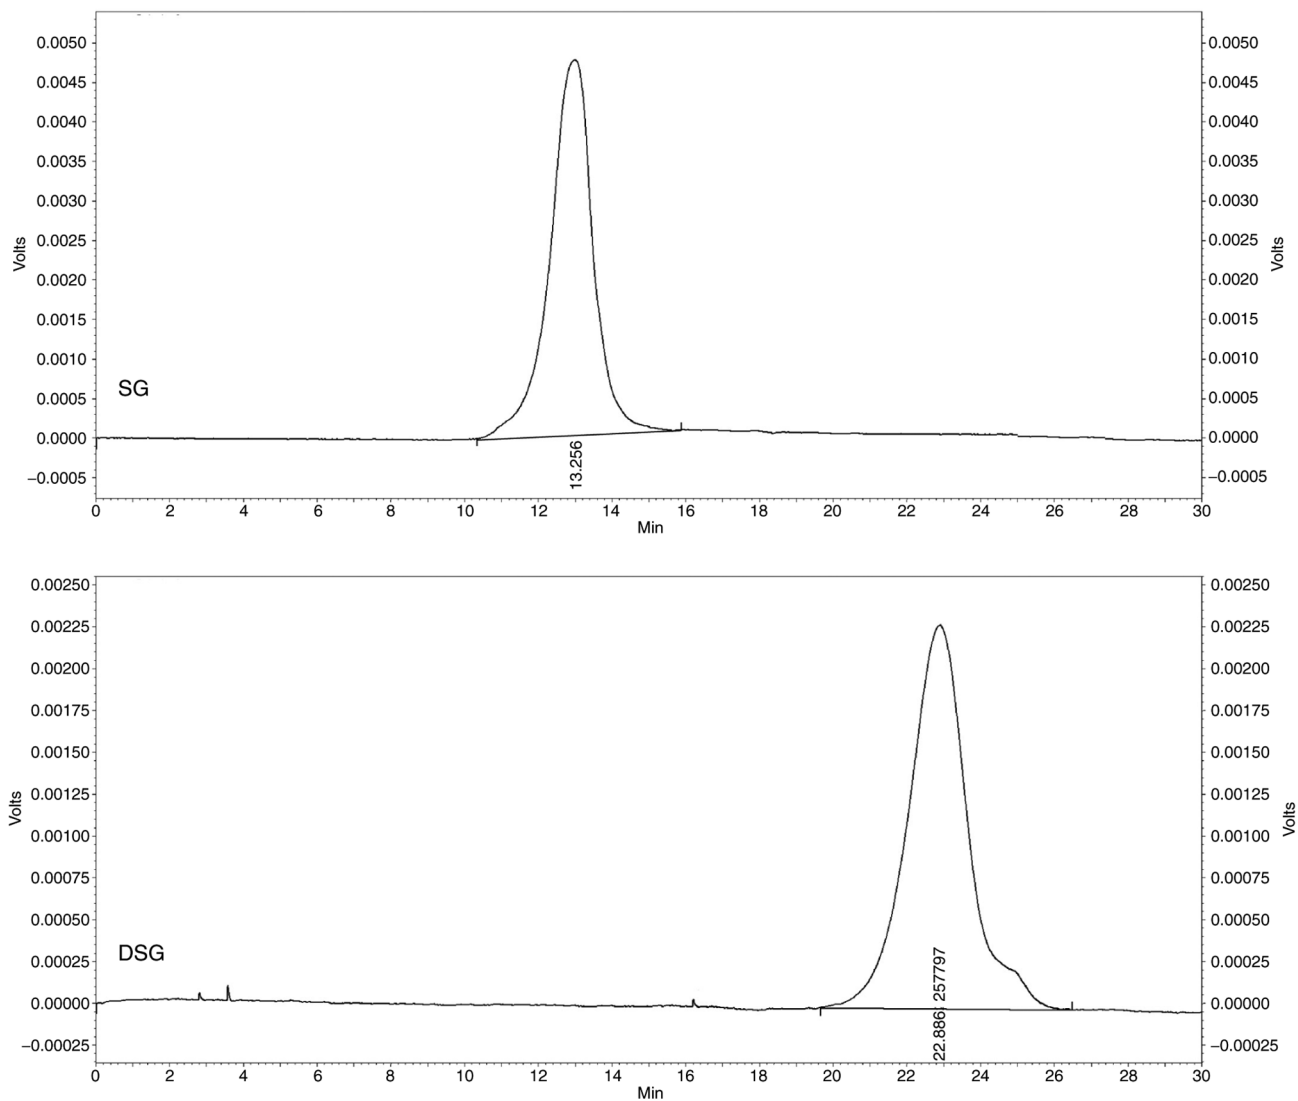

| Samples | Sulfate content (%) | Molecular mass moments (g/mol or Da) |                      |                      |
|---------|---------------------|--------------------------------------|----------------------|----------------------|
|         |                     | Mw × 10 <sup>3</sup>                 | Mn × 10 <sup>3</sup> | Mz × 10 <sup>3</sup> |
| SG      | 11.41 ± 0.14        | 217.45                               | 185.25               | 262.09               |
| DSG     | 12.92 ± 0.07        | 7.87                                 | 5.55                 | 12.73                |

Figure S2. Structural characterization of SG and DSG by FTIR and NMR analyses. (A) FTIR spectra, (B)  $^1\text{H}$ -NMR spectra and (C)  $^{13}\text{C}$ -NMR spectra (21). SG, sulfated galactan; DSG, degraded sulfated galactan; FTIR, Fourier-transform infrared; NMR, nuclear magnetic resonance; ppm, parts per million.

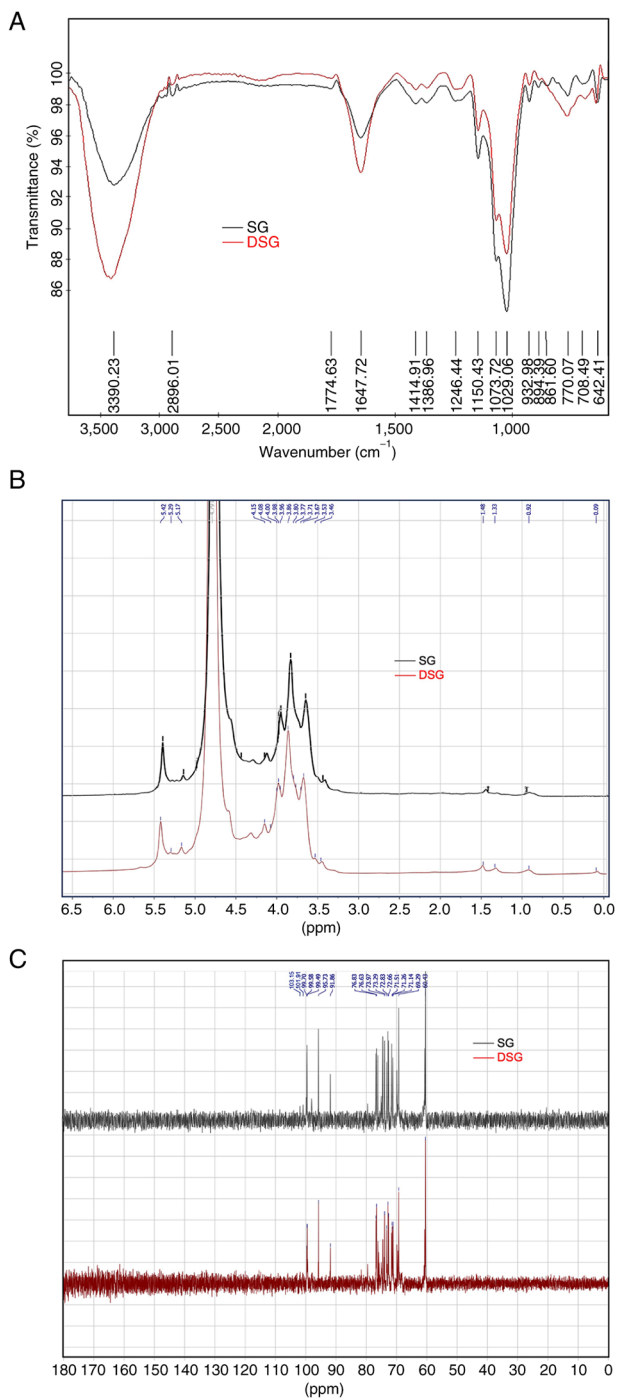

Figure S3. Cell morphology and membrane permeability of MCF-10A cells following treatment with DOXO (0.5  $\mu\text{g}/\text{ml}$ ), SG and DSG (both 1,000  $\mu\text{g}/\text{ml}$ ) for 24 h. (A) Phase-contrast micrographs presenting cellular morphology after treatment (scale bar, 75  $\mu\text{m}$ ). Red arrows indicate morphological changes in MCF-10A cells. (B) Immunofluorescence micrographs illustrating Hoechst and propidium iodide dual staining intensity (scale bar, 75  $\mu\text{m}$ ). SG, sulfated galactan; DSG, degraded sulfated galactan; DOXO, doxorubicin; NC, normal control.

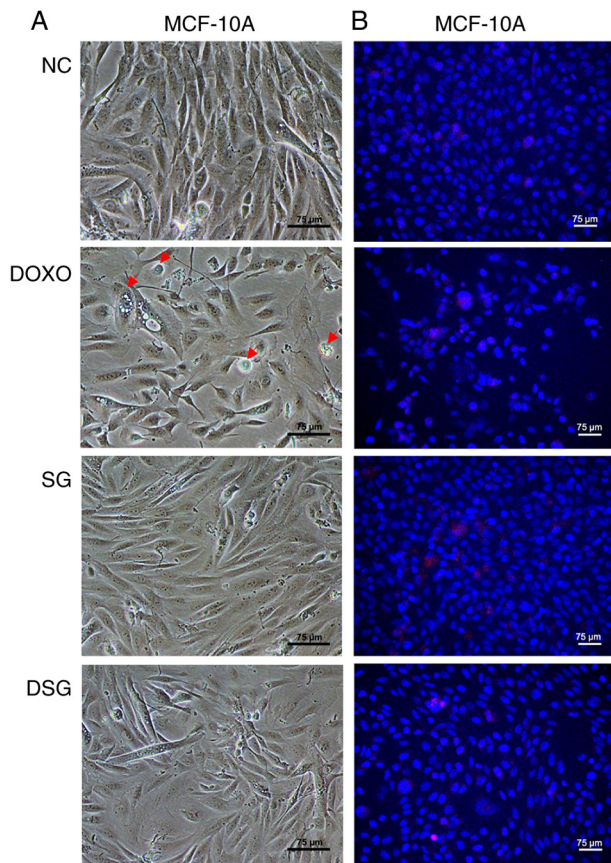

Supplement: Supplementary file 1 [file downloadSupplementary]
